# Supplementary material for: Do Patient-Reported Upper-Body Symptoms Predict Breast Cancer-Related Lymphoedema: Results from a Population-Based, Longitudinal Breast Cancer Cohort Study
Source: Cancers (Basel). 2022 Dec 5;14(23):5998. doi: 10.3390/cancers14235998 (PMC9740941; doi:10.3390/cancers14235998)
Supplement: Supplementary file 1 [file cancers-14-05998-s001.zip › cancers-2044335-supplementary.pdf]

**Table S1.** Characteristics of those in the Carolina Breast Cancer Study Phase 3 for whom we have breast cancer-related lymphoedema outcome data at baseline and 2- and 7-years post-diagnosis, as well as for those for whom breast cancer-related lymphoedema data is missing at the 2- or 7-year post-diagnosis follow-up.

|                                                    | Baseline                | 2-year post-diagnosis  |                         | 7-year post-diagnosis   |                         |
|----------------------------------------------------|-------------------------|------------------------|-------------------------|-------------------------|-------------------------|
| Characteristic (N%)                                | BCRL known<br>(n=2,442) | BCRL known<br>(n=2170) | BCRL missing<br>(n=272) | BCRL known<br>(n=1,698) | BCRL missing<br>(n=744) |
| Race                                               |                         |                        |                         |                         |                         |
| Black                                              | 1289 (52.8%)            | 1174 (54.1%)           | 115 (42.3%)**           | 925 (54.5%)             | 364 (48.9%)*            |
| White                                              | 1153 (47.2%)            | 996 (45.9%)            | 157 (57.7%)             | 773 (45.5%)             | 380 (51.1%)             |
| Age                                                |                         |                        |                         |                         |                         |
| <50                                                | 1189 (48.7%)            | 1008 (46.5%)           | 181 (66.5%)**           | 788 (46.4%)             | 401 (53.9%)*            |
| 50+                                                | 1253 (51.3%)            | 1162 (53.6%)           | 91 (33.5%)              | 910 (53.6%)             | 343 (46.1%)             |
| Stage at Diagnosis                                 |                         |                        |                         |                         |                         |
| I                                                  | 1141 (46.8%)            | 1044 (48.1%)           | 97 (35.9%)**            | 831 (48.9%)             | 310 (41.8%)**           |
| II                                                 | 1006 (41.2%)            | 876 (40.4%)            | 130 (48.2%)             | 679 (40.0%)             | 327 (44.1%)             |
| III                                                | 293 (12.0%)             | 250 (11.5%)            | 43 (15.9%)              | 188 (11.1%)             | 105 (14.2%)             |
| Treatment Type                                     |                         |                        |                         |                         |                         |
| Surgery Only                                       | 326 (13.4%)             | 281 (13.0%)            | 45 (16.5%)              | 207 (12.2%)             | 119 (16.0%)*            |
| Surgery, Radiation                                 | 617 (25.3%)             | 565 (26.0%)            | 52 (19.1%)              | 456 (26.9%)             | 161 (21.6%)             |
| Surgery,<br>Chemotherapy                           | 348 (14.3%)             | 305 (14.1%)            | 43 (15.8%)              | 240 (14.1%)             | 108 (14.5%)             |
| Surgery, Radiation,<br>Chemotherapy                | 1151 (47.1%)            | 1019 (47.0%)           | 132 (48.5%)             | 795 (46.8%)             | 356 (47.9%)             |
| Body mass index                                    |                         |                        |                         |                         |                         |
| <25                                                | 676 (27.8%)             | 595 (27.6%)            | 81 (29.8%)              | 472 (27.9%)             | 204 (27.5%)             |
| 25-30                                              | 1147 (47.2%)            | 1009 (46.7%)           | 138 (50.7%)             | 778 (46.0%)             | 369 (49.8%)             |
| 30+                                                | 609 (25.0%)             | 556 (25.7%)            | 53 (19.5%)              | 441 (26.1%)             | 168 (22.7%)             |
| Physical activity (3 months before diagnosis)      |                         |                        |                         |                         |                         |
| Sedentary                                          | 386 (15.8%)             | 322 (14.9%)            | 64 (23.6%)**            | 234 (13.8%)             | 152 (20.5%)**           |
| Insufficiently active                              | 546 (22.4%)             | 488 (22.5%)            | 58 (21.4%)              | 374 (22.0%)             | 172 (23.2%)             |
| Sufficiently active                                | 1506 (61.8%)            | 1357 (62.6%)           | 149 (55.0%)             | 1089 (64.2%)            | 417 (56.3%)             |
| Physical activity (median 5 months post-diagnosis) |                         |                        |                         |                         |                         |
| Sedentary                                          | 1062 (43.5%)            | 920 (42.4%)            | 142 (52.4%)**           | 706 (41.6%)             | 356 (47.9%)*            |
| Insufficiently active                              | 561 (23.0%)             | 515 (23.8%)            | 46 (17.0%)              | 408 (24.1%)             | 153 (20.6%)             |
| Sufficiently active                                | 816 (33.5%)             | 733 (33.8%)            | 83 (30.6%)              | 582 (34.3%)             | 234 (31.5%)             |
| Number of lymph nodes examined: median (min, max)  |                         |                        |                         |                         |                         |
|                                                    | 4 (0, 57)               | 4 (0, 98)              | 5 (0,99)                | 4 (0,97)                | 4 (0,99)                |

\*p<0.05; \*\*p<0.01.

**Table S2.** Relationships between upper-body symptoms (of at least moderate severity), and upper-body function, breast cancer-related lymphoedema, physical activity and quality of life up to 7-years post-diagnosis of breast cancer.

| Timing of assessment                                                                                          | Baseline <sup>a</sup> |                | 2-years post-diagnosis |                 | 7-years post-diagnosis <sup>b</sup> |                 |
|---------------------------------------------------------------------------------------------------------------|-----------------------|----------------|------------------------|-----------------|-------------------------------------|-----------------|
| Upper-body symptoms (at least one symptom of moderate severity or higher)                                     | no                    | yes            | no                     | yes             | no (pain only)                      | yes (pain only) |
| Upper-body function                                                                                           |                       |                |                        |                 |                                     |                 |
| QuickDASH <sup>c</sup> : median                                                                               | 6.8                   | 31.8***        | 4.5                    | 29.5***         | 6.8                                 | 47.7***         |
| (min, max)                                                                                                    | (0.0, 70.5)           | (0.0, 97.7)    | (0.0, 63.6)            | (0.0, 97.7)     | (0.0, 72.7)                         | (6.8, 100.0)    |
| IQR <sup>c</sup>                                                                                              | (2.3, 15.0)           | (18.2, 47.7)   | (0, 11.4)              | (15.9, 47.7)    | (2.3, 15.9)                         | (34.1, 61.4)    |
| Breast cancer-related lymphoedema                                                                             |                       |                |                        |                 |                                     |                 |
| Prevalence N (%)                                                                                              | 39 (3.2)***           | 124 (10.1)     | 118 (10.7)***          | 318 (31.5)      | 218 (17.9)***                       | 194 (42.2)      |
| Pre-diagnosis minutes/week of total physical activity (of moderate severity or higher)                        |                       |                |                        |                 |                                     |                 |
| median                                                                                                        | 240                   | 210*           | 240                    | 210*            | 240                                 | 210*            |
| (min, max)                                                                                                    | (0, 5400)             | (0, 4620)      | (0, 5400)              | (0, 5070)       | (0, 5400)                           | (0, 4260)       |
| IQR <sup>d</sup>                                                                                              | (90, 600)             | (60, 540)      | (90, 560)              | (70, 585)       | (90, 600)                           | (60, 540)       |
| Sedentary, N (%)                                                                                              | 165 (13.6)            | 218 (17.9)*    | 136 (12.3)             | 175 (17.4)**    | 149 (12.3)                          | 81 (17.6)**     |
| Insufficiently active N, (%)                                                                                  | 263 (21.8)            | 280 (22.9)*    | 243 (22.0)             | 234 (23.2)**    | 258 (21.2)                          | 113 (24.6)**    |
| Sufficiently Active N, (%)                                                                                    | 776 (64.5)            | 723 (59.2)*    | 726 (65.7)             | 599 (59.4)**    | 809 (66.5)                          | 266 (57.8)**    |
| Total physical activity (of moderate intensity or higher) as assessed at baseline <sup>a</sup> , minutes/week |                       |                |                        |                 |                                     |                 |
| median                                                                                                        | 85                    | 0***           | 90                     | 15***           | 90                                  | 0***            |
| (min, max)                                                                                                    | (0, 5040)             | (0, 4620)      | (0, 5040)              | (0, 4620)       | (0, 5040)                           | (0, 3690)       |
| IQR <sup>d</sup>                                                                                              | (0, 278)              | (0, 180)       | (0, 280)               | (0, 180)        | (0, 240)                            | (0, 120)        |
| Sedentary, N (%)                                                                                              | 445 (37.0)            | 613 (50.2)***  | 397 (35.9)             | 496 (49.3)***   | 438 (36.0)                          | 259 (56.6)***   |
| Insufficiently active N, (%)                                                                                  | 301 (25.0)            | 257 (21.0)***  | 290 (26.2)             | 213 (21.2)***   | 313 (25.7)                          | 91 (19.9)***    |
| Sufficiently Active N, (%)                                                                                    | 458 (38.0)            | 352 (28.8)***  | 420 (37.9)             | 298 (30.0)***   | 466 (38.3)                          | 108 (23.6)***   |
| Quality of life and subscales                                                                                 |                       |                |                        |                 |                                     |                 |
| Lymphoedema (+4 subscale)                                                                                     | 19.1 (1.4)            | 13.2 (4.6)***  | 19.1 (1.4)             | 12.9 (4.9)***   |                                     |                 |
| Functional status (FACT TOI) <sup>e</sup>                                                                     | 73.7 (13.5)           | 57.2 (17.0)*** | 79.4 (11.2)            | 60.8 (18.0)***  | 78.4 (12.0)                         | 55.9 (17.4)***  |
| Overall QoL (FACTG) <sup>e</sup>                                                                              | 118.3 (17.6)          | 97.5 (22.5)*** | 123.9 (16.1)           | 100.0 (24.9)*** | 122.7(17.2)                         | 93.2 (24.5)***  |
| Breast cancer QoL (FACTB+4) <sup>e</sup>                                                                      | 137.3 (17.9)          | 110.7(24.6)*** | 143.0 (16.5)           | 112.9 (27.7)*** |                                     |                 |

<sup>a</sup> Baseline assessment occurred between 2- to 9-months post-diagnosis (median time of assessment: 5 months post-diagnosis); <sup>b</sup> Only data collected from assessing general pain contributed to results related to 7-year post-diagnosis relationships; <sup>c</sup> QuickDASH, Disability of the Arm, Shoulder and Hand questionnaire, total score 0-100, lower score equals better function; <sup>d</sup> IQR, interquartile range; <sup>e</sup> FACT, Functional Assessment of Cancer Therapy questionnaire – TOI: trial outcome index = sum of physical, functional and breast cancer subscale; G, general = sum of physical, social, emotional and functional subscale; B+4 = sum of G and the breast cancer specific subscale – higher scores equal higher quality of of life; \*p value< 0.05; \*\*p value<0.01; \*\*\*p value<0.001.

**Table S3.** Odds of having breast cancer-related lymphoedema at 2- and 7-years post-diagnosis for those with any given upper-body symptom (of at least mild severity, and at least moderate severity) at baseline<sup>a</sup> among women in the Carolina Breast Cancer Study Phase 3.

|                                        | Breast cancer-related lymphoedema at 2-years post-diagnosis (n=2172) <sup>b</sup> |                                                       | Breast cancer-related lymphoedema at 7-years post-diagnosis (n=1694) <sup>b</sup> |                                                        |
|----------------------------------------|-----------------------------------------------------------------------------------|-------------------------------------------------------|-----------------------------------------------------------------------------------|--------------------------------------------------------|
|                                        | Symptom severity of mild or higher<br>OR (95% CI)                                 | Symptom severity of moderate or higher<br>OR (95% CI) | Symptom severity of mild or higher<br>OR (95% CI)                                 | Symptoms severity of moderate or higher<br>OR (95% CI) |
| <b>Symptom at baseline<sup>a</sup></b> |                                                                                   |                                                       |                                                                                   |                                                        |
| Pain with movement                     | 1.47 (1.13-1.90)                                                                  | 1.36 (1.00-1.84)                                      | 1.18 (0.89-1.56)                                                                  | 1.11 (0.79-1.56)                                       |
| Pain (general)                         | 1.63 (1.22-2.20)                                                                  | 1.06 (0.75-1.49)                                      | 1.45 (1.06-1.99)                                                                  | 1.03 (0.70-1.51)                                       |
| Pain with specific activity            | 1.29 (0.96-1.73)                                                                  | 1.04 (0.74-1.47)                                      | 1.08 (0.79-1.49)                                                                  | 1.21 (0.83-1.76)                                       |
| Poor range of arm movement             | 1.58 (1.22-2.04)                                                                  | 1.35 (1.00-1.84)                                      | 1.13 (0.85-1.50)                                                                  | 1.33 (0.94-1.87)                                       |
| Numbness                               | 1.50 (1.17-1.94)                                                                  | 1.45 (1.12-1.89)                                      | 1.26 (0.96-1.65)                                                                  | 1.22 (0.91-1.64)                                       |
| Stiffness (side)                       | 1.63 (1.25-2.11)                                                                  | 1.23 (0.91-1.67)                                      | 1.36 (1.02-1.80)                                                                  | 1.36 (0.98-1.90)                                       |
| Heaviness                              | 1.70 (1.30-2.23)                                                                  | 1.58 (1.15-2.18)                                      | 1.71 (1.28-2.29)                                                                  | 1.74 (1.22-2.47)                                       |
| Achiness                               | 1.56 (1.20-2.02)                                                                  | 1.50 (1.11-2.03)                                      | 1.55 (1.16-2.05)                                                                  | 1.70 (1.22-2.36)                                       |
| Tightness                              | 1.86 (1.44-2.39)                                                                  | 1.73 (1.31-2.28)                                      | 1.94 (1.47-2.55)                                                                  | 1.70 (1.25-2.31)                                       |
| Tingling                               | 1.23 (0.95-1.60)                                                                  | 0.98 (0.72-1.33)                                      | 1.34 (1.01-1.77)                                                                  | 1.26 (0.90-1.76)                                       |
| Weakness                               | 1.37 (1.03-1.83)                                                                  | 1.10 (0.78-1.55)                                      | 1.53 (1.12-2.07)                                                                  | 1.13 (0.77-1.65)                                       |
| Stiffness (arm, shoulder, hand)        | 1.18 (0.90-1.55)                                                                  | 1.24 (0.89-1.74)                                      | 1.10 (0.81-1.48)                                                                  | 1.55 (1.06-2.27)                                       |

<sup>a</sup> Baseline assessment occurred up to 9 months post-diagnosis (median time of assessment: 5 months post-diagnosis); <sup>b</sup> 4 women are missing baseline symptom data, and all models adjusted for participant race, age, body mass index at baseline, pre- and post-diagnostic physical activity levels, cancer stage at diagnosis, number of extracted lymph nodes, treatment type (surgery, surgery+radiation, surgery+chemotherapy, or surgery+radiation+chemotherapy) and upper-body function (as assessed by QuickDASH) for the symptoms model or number of symptoms (graded as mild severity or higher) for the upper-body function models. OR, odds ratio; CI, confidence interval.

**Table S4.** Prevalence of breast cancer-related lymphoedema and odds ratio of lymphoedema at 2- and 7-years post-diagnosis breast cancer for those with 0, 1-2, 3-4, 5-6, 7-9 upper-body symptoms (of at least mild severity) at baseline among women in the Carolina Breast Cancer Study Phase 3.

| Breast cancer-related lymphoedema at 2 years post-diagnosis |                                 |                                             |                                                           |                                                        |                                                    |
|-------------------------------------------------------------|---------------------------------|---------------------------------------------|-----------------------------------------------------------|--------------------------------------------------------|----------------------------------------------------|
| Number of baseline <sup>a</sup> symptoms                    | Lymphoedema Prevalence<br>N (%) | Unadjusted Model<br>(n=2165)<br>OR (95% CI) | Demographic Model <sup>b</sup><br>(n=2150)<br>OR (95% CI) | Clinical Model <sup>c</sup><br>(n=2163)<br>OR (95% CI) | Full model <sup>d</sup><br>(n=2148)<br>OR (95% CI) |
| 0                                                           | 43/125 (8.2%)                   | 1 (ref)                                     | 1 (ref)                                                   | 1 (ref)                                                | 1 (ref)                                            |
| 1-2                                                         | 59/441 (13.4%)                  | 1.73 (1.14-2.62)**                          | 1.51 (0.99-2.31)                                          | 1.52 (0.99-2.34)                                       | 1.32 (0.85-2.06)                                   |
| 3-4                                                         | 70/331 (21.2%)                  | 3.01 (2.00-4.52)***                         | 2.50 (1.64-3.82)***                                       | 2.32 (1.52-3.55)**                                     | 1.92 (1.23-2.98)**                                 |
| 5-6                                                         | 64/279 (22.9%)                  | 3.34 (2.20-5.07)***                         | 2.61 (1.68-4.06)***                                       | 2.58 (1.66-3.99)***                                    | 2.01 (1.27-3.19)**                                 |
| 7-9                                                         | 215/583 (36.9%)                 | 6.55 (4.59-9.33)***                         | 4.13 (2.70-6.30)***                                       | 4.55 (3.13-6.61)***                                    | 2.88 (1.84-4.49)***                                |
| Breast cancer-related lymphoedema at 7 years post-diagnosis |                                 |                                             |                                                           |                                                        |                                                    |
| Number of baseline <sup>a</sup> symptoms                    | Lymphoedema Prevalence<br>N (%) | Unadjusted Model<br>(n=1694)<br>OR (95% CI) | Demographic Model <sup>b</sup><br>(n=1684)<br>OR (95% CI) | Clinical Model <sup>c</sup><br>(n=1693)<br>OR (95% CI) | Full model <sup>d</sup><br>(n=1683)<br>OR (95% CI) |
| 0                                                           | 43/414 (10.4%)                  | 1 (ref)                                     | 1 (ref)                                                   | 1 (ref)                                                | 1 (ref)                                            |
| 1-2                                                         | 58/352 (16.5%)                  | 1.70 (1.11-2.60)*                           | 1.44 (0.93-2.23)                                          | 1.43 (0.92-2.23)                                       | 1.19 (0.75-1.87)                                   |
| 3-4                                                         | 66/266 (17.8%)                  | 2.85 (1.87-4.34)***                         | 2.20 (1.41-3.42)**                                        | 2.00 (1.28-3.11)**                                     | 1.50 (0.94-2.39)                                   |
| 5-6                                                         | 58/219 (26.5%)                  | 3.11 (2.01-4.81)***                         | 2.18 (1.37-3.46)**                                        | 2.20 (1.39-3.48)**                                     | 1.49 (0.91-2.44)                                   |
| 7-9                                                         | 190/439 (43.3%)                 | 6.58 (4.56-9.51)***                         | 3.52 (2.25-5.51)***                                       | 4.19 (2.84-6.18)***                                    | 2.15 (1.34-3.46)**                                 |

<sup>a</sup> Baseline assessment occurred between 2- and 9-months post-diagnosis (median time of assessment: 5 months post-diagnosis); <sup>b</sup> Demographic model is adjusted for participant race, age, body mass index at baseline, pre- and post-diagnostic physical activity levels and baseline upper body function (as

---

measured by QuickDASH); <sup>c</sup> Clinical model is adjusted for participant cancer stage at diagnosis, number of extracted lymph nodes, and treatment type (surgery, surgery+radiation, surgery+chemotherapy, or surgery+radiation+chemotherapy); <sup>d</sup> The full model is adjusted for covariates in both the demographic and clinical models. CI, confidence interval; OR, odds ratio. \* p value<0.05; \*\*p value<0.01; \*\*\*p value<0.001.
